# Supplementary material for: Coherent vibrational modes promote the ultrafast internal conversion and intersystem crossing in thiobases
Source: Royal Society of Chemistry journal article supplement (doi:10.1039/d2cp02073d), 2022-01-01
Supplement: d2cp02073d1.pdf [file d2cp02073d1.pdf]

## Coherent vibrational modes promote the ultrafast internal conversion and intersystem crossing in thiobases

Danielle Cristina Teles-Ferreira<sup>a,b†</sup>, Ivo HM van Stokkum<sup>c‡</sup>, Irene Conti<sup>e</sup>, Lucia Ganzer<sup>d</sup>, Cristian Manzoni<sup>d</sup>, Marco Garavelli<sup>e</sup>, Giulio Cerullo<sup>d</sup>, Artur Nenov<sup>e,\*</sup>, Rocío Borrego-Varillas<sup>d,\*</sup> and Ana Maria de Paula<sup>a,\*</sup>

### 1. Spectroscopy of 4TU

Figure S 1 a) reports the 4-thiouracil normalized steady-state absorption (black curve), pump pulse profile (red curve), and the photoluminescence (PL). The panels b), c) and d) detail the 4-thiouracil transient absorption spectroscopy (TAS) [1] which is strongly modulated by coherent oscillations.

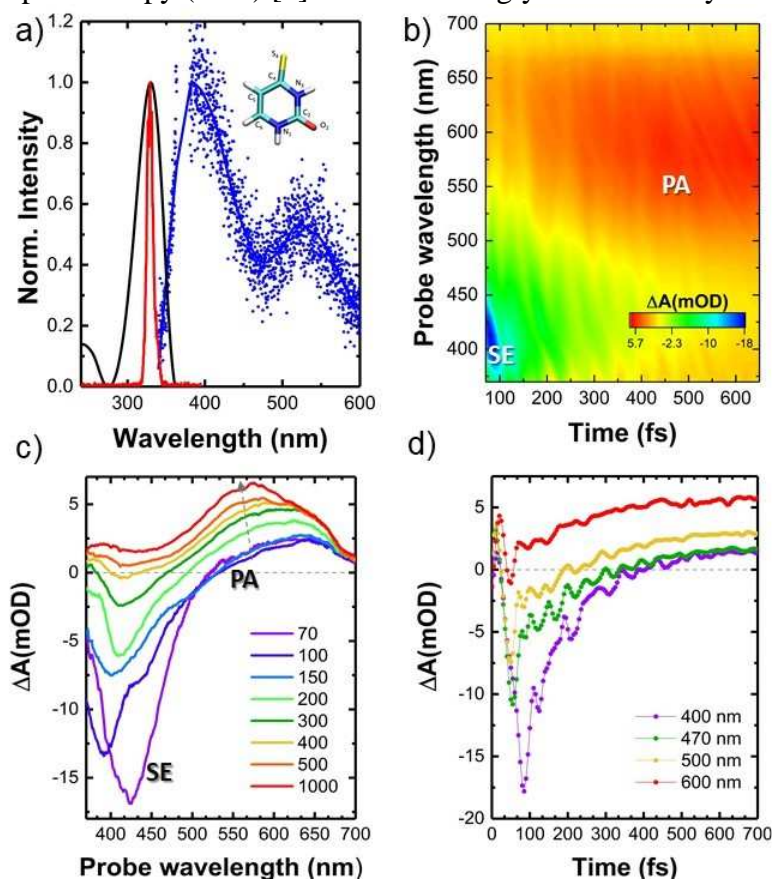

Figure S 1. a) 4-Thiouracil normalized optical absorption intensity (black curve), normalized pulse spectrum intensity used as pump in the TAS experiments (red curve), and normalized PL spectrum intensity (blue curve is the fit and blue dots are the data) obtained with the pump at 330 nm. b) TAS map; c) differential absorption spectra at selected time delays. d) differential absorption dynamics at selected probe wavelengths [1].

## 2. Energetics at critical points along the relaxation profile

**Table S1.** Energies (eV) of the lowest two singlet and triplet state of 4-thiothymidine at representative geometries

|                                    | Min <sub>TT</sub> S <sub>0</sub> | Min <sub>TT</sub> S <sub>2</sub><br>( <sup>1</sup> ππ*) | Min <sub>TT</sub> S <sub>1</sub><br>( <sup>1</sup> ππ*) | CI <sub>TT</sub> S <sub>2</sub> /S <sub>1</sub> | Min <sub>TT</sub> T <sub>1</sub><br>( <sup>1</sup> ππ*) | Min <sub>TT</sub> T <sub>2</sub><br>( <sup>1</sup> nπ*) |
|------------------------------------|----------------------------------|---------------------------------------------------------|---------------------------------------------------------|-------------------------------------------------|---------------------------------------------------------|---------------------------------------------------------|
| S <sub>0</sub>                     | 0,00                             | 0,54                                                    | 0,58                                                    | 0,89                                            | 0,29                                                    | 0,55                                                    |
| S <sub>1</sub> ( <sup>1</sup> nπ*) | 3,19                             | 3,17                                                    | <b>2,93</b>                                             | <b>3,73</b>                                     | 3,15                                                    | 2,98                                                    |
| S <sub>2</sub> ( <sup>1</sup> ππ*) | 3,88                             | <b>3,55</b>                                             | 3,70                                                    | <b>3,79</b>                                     | 3,73                                                    | 3,71                                                    |
| T <sub>1</sub> ( <sup>3</sup> ππ*) |                                  | 2,91                                                    | 2,87                                                    | 0,21                                            | <b>2,73</b>                                             | 2,89                                                    |
| T <sub>2</sub> ( <sup>3</sup> nπ*) |                                  | 3,23                                                    | 3,10                                                    |                                                 | 3,21                                                    | <b>3,03</b>                                             |

**Table S2.** Energies (eV) of the lowest two singlet and triplet state of 4-thiouracil at representative geometries

|                                    | Min <sub>TU</sub> S <sub>0</sub> | Min <sub>TU</sub> S <sub>2</sub><br>( <sup>1</sup> ππ*) | Min <sub>TU</sub> S <sub>1</sub><br>( <sup>1</sup> ππ*) | CI <sub>TU</sub> S <sub>2</sub> /S <sub>1</sub><br>(planar) | CI <sub>TU</sub> S <sub>2</sub> /S <sub>1</sub><br>(twisted) | Min <sub>TU</sub> T <sub>1</sub><br>( <sup>1</sup> nπ*) |
|------------------------------------|----------------------------------|---------------------------------------------------------|---------------------------------------------------------|-------------------------------------------------------------|--------------------------------------------------------------|---------------------------------------------------------|
| S <sub>0</sub>                     | 0,00                             | 0,50                                                    | 0,36                                                    | 1,19                                                        | 1,50                                                         | 0,36                                                    |
| S <sub>1</sub> ( <sup>1</sup> nπ*) | 2,93                             | 2,82                                                    | <b>2,72</b>                                             | <b>3,89</b>                                                 | <b>4,16</b>                                                  | 2,79                                                    |
| S <sub>2</sub> ( <sup>1</sup> ππ*) | <b>3,84</b>                      | <b>3,46</b>                                             | 3,63                                                    | <b>4,05</b>                                                 | <b>4,23</b>                                                  | 3,67                                                    |
| T <sub>1</sub> ( <sup>3</sup> ππ*) | 2,90                             | 2,87                                                    | 2,76                                                    |                                                             |                                                              | <b>2,69</b>                                             |
| T <sub>2</sub> ( <sup>3</sup> nπ*) | 3,04                             | 2,95                                                    | 2,90                                                    |                                                             |                                                              | 2,98                                                    |

### 3. Geometric parameters for 4-thiouracil

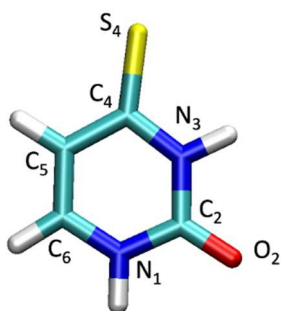

**Table S3.** Geometrical parameters of 4-thiouracil at representative geometries

|                                                                 | <b>FC</b> | <b>Min<sub>S2</sub></b> | <b>CI</b>   | <b>Min<sub>S1</sub></b> | <b>Min<sub>T1</sub></b> |
|-----------------------------------------------------------------|-----------|-------------------------|-------------|-------------------------|-------------------------|
| N <sub>1</sub> C <sub>6</sub> (A)                               | 1.37      | 1.38                    | 1.32        | 1.41                    | 1.40                    |
| C <sub>5</sub> C <sub>6</sub> (A)                               | 1.36      | 1.42                    | <b>1.56</b> | 1.39                    | 1.41                    |
| C <sub>4</sub> C <sub>5</sub> (A)                               | 1.43      | 1.38                    | 1.37        | 1.40                    | 1.40                    |
| C <sub>4</sub> S <sub>4</sub> (A)                               | 1.66      | <b>1.81</b>             | 1.72        | 1.76                    | 1.73                    |
| C <sub>4</sub> N <sub>3</sub> (A)                               | 1.38      | 1.41                    | 1.45        | 1.41                    | 1.42                    |
| C <sub>2</sub> N <sub>3</sub> (A)                               | 1.38      | 1.38                    | 1.34        | 1.38                    | 1.38                    |
| N <sub>1</sub> C <sub>2</sub> (A)                               | 1.36      | 1.38                    | 1.43        | 1.37                    | 1.37                    |
| N <sub>3</sub> C <sub>4</sub> S <sub>4</sub> (°)                | 120       | <b>112</b>              | 112         | 116                     | 119                     |
| C <sub>4</sub> N <sub>3</sub> H (°)                             | 117       | 119                     | <b>110</b>  | 122                     | 120                     |
| O <sub>2</sub> C <sub>2</sub> N <sub>3</sub> (°)                | 123       | 123                     | <b>129</b>  | 121                     | 122                     |
| HC <sub>5</sub> C <sub>6</sub> H (°)                            | 0         | -4                      | 1           | -2                      | -6                      |
| S <sub>4</sub> C <sub>4</sub> C <sub>5</sub> C <sub>6</sub> (°) | 179       | 178                     | 179         | 184                     | <b>168</b>              |

#### 4. Geometric parameters for 4-ThioThymidine

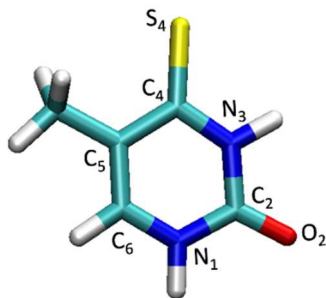

**Table S4.** Geometrical parameters of 4-thiothymidine at representative geometries

|                                                                 | FC   | Min <sub>S2</sub> | CI          | Min <sub>S1</sub> | Min <sub>T1</sub> |
|-----------------------------------------------------------------|------|-------------------|-------------|-------------------|-------------------|
| N <sub>1</sub> C <sub>6</sub> (Å)                               | 1.39 | 1.39              | 1.34        | 1.41              | 1.40              |
| C <sub>5</sub> C <sub>6</sub> (Å)                               | 1.37 | 1.40              | <b>1.50</b> | 1.39              | 1.44              |
| C <sub>4</sub> C <sub>5</sub> (Å)                               | 1.44 | 1.39              | 1.37        | 1.40              | 1.39              |
| C <sub>4</sub> S <sub>4</sub> (Å)                               | 1.66 | <b>1.83</b>       | 1.75        | 1.76              | 1.71              |
| C <sub>4</sub> N <sub>3</sub> (Å)                               | 1.39 | 1.40              | 1.44        | 1.41              | 1.41              |
| C <sub>2</sub> N <sub>3</sub> (Å)                               | 1.39 | 1.39              | 1.35        | 1.39              | 1.38              |
| N <sub>1</sub> C <sub>2</sub> (Å)                               | 1.39 | 1.39              | 1.45        | 1.38              | 1.39              |
| N <sub>3</sub> C <sub>4</sub> S <sub>4</sub> (°)                | 122  | <b>114</b>        | 118         | 112               | 119               |
| C <sub>4</sub> N <sub>3</sub> H (°)                             | 118  | 119               | 116         | 120               | 120               |
| O <sub>2</sub> C <sub>2</sub> N <sub>3</sub> (°)                | 122  | 122               | <b>127</b>  | 121               | 122               |
| H <sub>3</sub> CC <sub>5</sub> C <sub>6</sub> H (°)             | -1   | 2                 | <b>-24</b>  | -7                | -4                |
| S <sub>4</sub> C <sub>4</sub> C <sub>5</sub> C <sub>6</sub> (°) | 179  | <b>193</b>        | 181         | <b>157</b>        | 180               |

#### 5. Normal mode analysis

To obtain a better idea of the ES vibrational dynamics of 4-ThioUracil (4TU) and 4-ThioThymidine (4TT) we performed a normal mode analysis. To this aim:

- S<sub>2</sub> normal modes were used to project geometrical deformations from the FC to the S<sub>2</sub> minimum
- S<sub>2</sub> normal modes were used to project geometrical deformations from the S<sub>2</sub> minimum to the CI(S<sub>2</sub>/S<sub>1</sub>);
- S<sub>1</sub> normal modes were used to project the dynamics in the S<sub>1</sub> state from the CI towards the corresponding minimum;
- T<sub>1</sub> normal modes were used to study the geometrical deformation from the S<sub>1</sub> minimum to the T<sub>1</sub> minimum.

Starting from the definition of the normal mode matrix

$$\mathbb{P}^\dagger = \mathbb{M}^{\frac{1}{2}} \nabla_{\tilde{\mathbf{q}}} \mathbf{Q}$$

where  $\mathbb{P}$  is a matrix whose columns are the normal modes of the system  $\tilde{\mathbf{q}}_k$  expressed in normalized mass-weighted Cartesian coordinates  $\mathbf{Q}$  and  $\mathbb{M}$  is a diagonal matrix with the nuclear masses, one can reformulate it in terms of finite differences

$$\mathbb{P}^\dagger \Delta \tilde{\mathbf{q}} = \mathbb{M}^{\frac{1}{2}} \Delta \mathbf{Q}$$

Thus,  $\Delta \tilde{\mathbf{q}}$  represents the array of unitless displacements  $\tilde{\mathbf{d}}$  along the normal modes of the system when the difference is taken with respect to the reference point on the  $i$ -th electronic state. Rearranging gives the final working equation

$$\tilde{\mathbf{d}}_i = \mathbb{P}^{-1} \mathbb{M}^{\frac{1}{2}} \Delta \mathbf{Q}$$

which allows to estimate how much every normal mode  $\tilde{\mathbf{q}}_k$  has to be displaced to connect two points in Cartesian coordinate space of the potential energy surface of the  $i$ -th electronic state.  $\Delta \mathbf{Q}$  is the

difference in Cartesian coordinates between two geometries. The displacements  $\tilde{\mathbf{d}}_i$  can be related to spectroscopic parameters like the Huang-Rhys factors  $S_{ik}$  or the reorganization energy  $\lambda_{ik}$  of the system:

$$S_{ik} = \frac{\tilde{d}_{ik}^2 \omega_k}{2\hbar} \quad \text{and} \quad \lambda = \frac{\tilde{d}_{ik}^2 \omega_k^2}{2\hbar}$$

where  $\omega_k$  is the frequency of the  $k$ -th normal mode.

With the normal mode analysis attention should be paid to global translational and rotational degrees of freedom which have to be removed prior to computing the difference in Cartesian coordinates. To this end we followed an iterative procedure relying on the vectors of inertia in order to minimize the distance in space between two geometries as outlined in ref. [Kurtz, L. Dissertation at the LMU Muenchen, 2001.].

In Tables 5 and 6 we list the normal modes (below  $2000 \text{ cm}^{-1}$ )<sup>1</sup> and reorganization energies (in  $\text{cm}^{-1}$ ) along the FC→T<sub>1</sub> path (following a)-d)) for 4TU and 4TT. Note that for 4TT the entire nucleoside was considered in the calculation of the normal modes. For the sake of a better comparison in Table 7 we also report normal mode analysis on 4TT based on normal modes and frequencies computed only for the 4-thiothymine chromophore. Color code is used to label normal modes with significant reorganization energies for modes with frequencies below  $1000 \text{ cm}^{-1}$  (i.e. modes which can be resolved with our experimental set up) Normal modes which are observed experimentally following our analysis are highlighted.

The total reorganization energy resulting from the projection is compared with the QMMM energy difference between the two geometries. The values show reasonable agreement and demonstrate the stability and reliability of the projection procedure. The only discrepancy is observed for the distortion leading from the S<sub>2</sub> minimum to the CI<sub>TT</sub>(S<sub>2</sub>/S<sub>1</sub>) of 4TT where the normal mode projection predicts triple increase in reorganization energy with respect to the QMMM value. This is due to the large geometrical deformation towards the CI (i.e. methyl out-of-plane) which breaks the harmonic approximation in which the normal modes are defined.

---

<sup>1</sup> High frequency C-H, N-H and O-H stretchings are not involved in the structural deformations and are thus left out

## 4-thioUracil

**Table S5.** Reorganization energies  $\lambda$  [cm<sup>-1</sup>] along the normal modes of 4TU along the deformations FC→Min<sub>S2</sub>, Min<sub>S2</sub>→CI, CI→Min<sub>S1</sub> and Min<sub>S1</sub>→Min<sub>T1</sub>. Color code is used to label modes with notable reorganization energies below 1000 cm<sup>-1</sup>.

| FC → Min <sub>S2</sub> |                                 |                                  | Min <sub>S2</sub> → CI |                                 |                                  | CI → Min <sub>S1</sub> |                                 |                                  | Min <sub>S1</sub> → Min <sub>T1</sub> |                                 |                                  |
|------------------------|---------------------------------|----------------------------------|------------------------|---------------------------------|----------------------------------|------------------------|---------------------------------|----------------------------------|---------------------------------------|---------------------------------|----------------------------------|
| Mode                   | $\omega$<br>[cm <sup>-1</sup> ] | $\lambda$<br>[cm <sup>-1</sup> ] | Mode                   | $\omega$<br>[cm <sup>-1</sup> ] | $\lambda$<br>[cm <sup>-1</sup> ] | Mode                   | $\omega$<br>[cm <sup>-1</sup> ] | $\lambda$<br>[cm <sup>-1</sup> ] | Mode                                  | $\omega$<br>[cm <sup>-1</sup> ] | $\lambda$<br>[cm <sup>-1</sup> ] |
| 1                      | 122.1                           | 1                                | 1                      | 122.1                           | 3                                | 1                      | 121.4                           | 8                                | 1                                     | 115.9                           | 39                               |
| 2                      | 180.3                           | 11                               | 2                      | 180.3                           | 26                               | 2                      | 138.6                           | 13                               | 2                                     | 179.2                           | 90                               |
| 3                      | 226.2                           | 80                               | 3                      | 226.2                           | 1                                | 3                      | 213.4                           | 20                               | 3                                     | 220.2                           | 210                              |
| 4                      | 259.3                           | 0                                | 4                      | 259.3                           | 16                               | 4                      | 222.8                           | 176                              | 4                                     | 279.5                           | 101                              |
| 5                      | 387.2                           | 407                              | 5                      | 387.2                           | 87                               | 5                      | 400.2                           | 0                                | 5                                     | 408.9                           | 0                                |
| 6                      | 425.3                           | 7                                | 6                      | 425.3                           | 0                                | 6                      | 427.4                           | 21                               | 6                                     | 443.6                           | 1                                |
| 7                      | 491.5                           | 202                              | 7                      | 491.5                           | 353                              | 7                      | 486.7                           | 759                              | 7                                     | 495.3                           | 1                                |
| 8                      | 538.1                           | 11                               | 8                      | 538.1                           | 37                               | 8                      | 519.2                           | 10                               | 8                                     | 551.8                           | 16                               |
| 9                      | 564                             | 3                                | 9                      | 564                             | 7                                | 9                      | 575.2                           | 4                                | 9                                     | 596.9                           | 2                                |
| 10                     | 646.4                           | 1                                | 10                     | 646.4                           | 0                                | 10                     | 611.3                           | 29                               | 10                                    | 634.4                           | 12                               |
| 11                     | 675                             | 1016                             | 11                     | 675                             | 9                                | 11                     | 689.1                           | 42                               | 11                                    | 704                             | 0                                |
| 12                     | 702.9                           | 37                               | 12                     | 702.9                           | 7                                | 12                     | 700.8                           | 0                                | 12                                    | 714                             | 2                                |
| 13                     | 791.9                           | 5                                | 13                     | 791.9                           | 10                               | 13                     | 737.8                           | 23                               | 13                                    | 766.6                           | 6                                |
| 14                     | 846                             | 0                                | 14                     | 846                             | 54                               | 14                     | 797.4                           | 68                               | 14                                    | 800.1                           | 1                                |
| 15                     | 902.3                           | 13                               | 15                     | 902.3                           | 629                              | 15                     | 944.6                           | 162                              | 15                                    | 929.7                           | 37                               |
| 16                     | 990                             | 38                               | 16                     | 990                             | 498                              | 16                     | 987.9                           | 317                              | 16                                    | 991.2                           | 4                                |
| 17                     | 1011.3                          | 585                              | 17                     | 1011.3                          | 492                              | 17                     | 1043.4                          | 188                              | 17                                    | 1037.8                          | 30                               |
| 18                     | 1052.3                          | 2                                | 18                     | 1052.3                          | 519                              | 18                     | 1139.5                          | 767                              | 18                                    | 1114.3                          | 18                               |
| 19                     | 1202.8                          | 15                               | 19                     | 1202.8                          | 29                               | 19                     | 1208.5                          | 147                              | 19                                    | 1223.2                          | 0                                |
| 20                     | 1297                            | 11                               | 20                     | 1297                            | 0                                | 20                     | 1305.9                          | 8                                | 20                                    | 1302.6                          | 14                               |
| 21                     | 1317.9                          | 74                               | 21                     | 1317.9                          | 940                              | 21                     | 1381.2                          | 2187                             | 21                                    | 1352.8                          | 15                               |
| 22                     | 1413.5                          | 593                              | 22                     | 1413.5                          | 169                              | 22                     | 1442.3                          | 1794                             | 22                                    | 1445.7                          | 17                               |
| 23                     | 1430.4                          | 29                               | 23                     | 1430.4                          | 86                               | 23                     | 1469.8                          | 277                              | 23                                    | 1481.1                          | 0                                |
| 24                     | 1514.1                          | 99                               | 24                     | 1514.1                          | 1                                | 24                     | 1506.5                          | 493                              | 24                                    | 1508.7                          | 0                                |
| 25                     | 1539.3                          | 443                              | 25                     | 1539.3                          | 113                              | 25                     | 1528.8                          | 1138                             | 25                                    | 1552.7                          | 6                                |
| 26                     | 1767                            | 11                               | 26                     | 1767                            | 17                               | 26                     | 1756.7                          | 39                               | 26                                    | 1764.2                          | 0                                |

|                                      |      |                         |      |                         |      |                         |     |
|--------------------------------------|------|-------------------------|------|-------------------------|------|-------------------------|-----|
| $\lambda$ (proj) [cm <sup>-1</sup> ] | 3694 | $\lambda$ (proj) [cm-1] | 4103 | $\lambda$ (proj) [cm-1] | 8690 | $\lambda$ (proj) [cm-1] | 622 |
| $\Delta E$ [cm <sup>-1</sup> ]       | 3710 | $\Delta E$ [cm-1]       | 3952 | $\Delta E$ [cm-1]       | 9597 | $\Delta E$ [cm-1]       | 645 |

### 4-thioThymidine

**Table S6.** Reorganization energies  $\lambda$  [ $\text{cm}^{-1}$ ] along the normal modes of 4TT along the deformations FC $\rightarrow$ Min<sub>S2</sub>, Min<sub>S2</sub> $\rightarrow$ CI, CI $\rightarrow$ Min<sub>S1</sub> and Min<sub>S1</sub> $\rightarrow$ Min<sub>T1</sub> using the normal modes of the nucleoside. Color code is used to label modes with notable reorganization energies below 1000  $\text{cm}^{-1}$ . Mixing of energetically close lying modes involving the chromophore and the sugar leading to the chromophore deformations being present in two or three modes.

| FC $\rightarrow$ Min <sub>S2</sub> |                                  |                                   | Min <sub>S2</sub> $\rightarrow$ CI |                                  |                                   | CI $\rightarrow$ Min <sub>S1</sub> |                                  |                                   | Min <sub>S1</sub> $\rightarrow$ Min <sub>T1</sub> |                                  |                                   |
|------------------------------------|----------------------------------|-----------------------------------|------------------------------------|----------------------------------|-----------------------------------|------------------------------------|----------------------------------|-----------------------------------|---------------------------------------------------|----------------------------------|-----------------------------------|
| Mode                               | $\omega$<br>[ $\text{cm}^{-1}$ ] | $\lambda$<br>[ $\text{cm}^{-1}$ ] | Mode                               | $\omega$<br>[ $\text{cm}^{-1}$ ] | $\lambda$<br>[ $\text{cm}^{-1}$ ] | Mode                               | $\omega$<br>[ $\text{cm}^{-1}$ ] | $\lambda$<br>[ $\text{cm}^{-1}$ ] | Mode                                              | $\omega$<br>[ $\text{cm}^{-1}$ ] | $\lambda$<br>[ $\text{cm}^{-1}$ ] |
| 1                                  | 66.1                             | 0                                 | 1                                  | 66.1                             | 0                                 | 1                                  | -43.2                            | 0                                 | 1                                                 | 64.6                             | 0                                 |
| 2                                  | 75.2                             | 0                                 | 2                                  | 75.2                             | 0                                 | 2                                  | 63                               | 0                                 | 2                                                 | 81.5                             | 0                                 |
| 3                                  | 80.6                             | 0                                 | 3                                  | 80.6                             | 0                                 | 3                                  | 97                               | 0                                 | 3                                                 | 89.6                             | 0                                 |
| 4                                  | 119.2                            | 14                                | 4                                  | 119.2                            | 37                                | 4                                  | 102.7                            | 1                                 | 4                                                 | 119.7                            | 16                                |
| 5                                  | 127.1                            | 7                                 | 5                                  | 127.1                            | 9                                 | 5                                  | 119.5                            | 32                                | 5                                                 | 125.3                            | 75                                |
| 6                                  | 138.7                            | 6                                 | 6                                  | 138.7                            | 75                                | 6                                  | 137.4                            | 6                                 | 6                                                 | 141.5                            | 1                                 |
| 7                                  | 163.9                            | 48                                | 7                                  | 163.9                            | 134                               | 7                                  | 150.9                            | 175                               | 7                                                 | 156.3                            | 43                                |
| 8                                  | 171.7                            | 1                                 | 8                                  | 171.7                            | 4                                 | 8                                  | 158.4                            | 48                                | 8                                                 | 166.5                            | 19                                |
| 9                                  | 196.7                            | 0                                 | 9                                  | 196.7                            | 14                                | 9                                  | 192                              | 5                                 | 9                                                 | 193.8                            | 0                                 |
| 10                                 | 224.4                            | 13                                | 10                                 | 224.4                            | 24                                | 10                                 | 209.1                            | 222                               | 10                                                | 225.4                            | 31                                |
| 11                                 | 243.8                            | 10                                | 11                                 | 243.8                            | 2                                 | 11                                 | 238                              | 73                                | 11                                                | 242.1                            | 75                                |
| 12                                 | 264.7                            | 82                                | 12                                 | 264.7                            | 188                               | 12                                 | 261.4                            | 311                               | 12                                                | 257.3                            | 363                               |
| 13                                 | 268.2                            | 61                                | 13                                 | 268.2                            | 16                                | 13                                 | 280                              | 275                               | 13                                                | 278.3                            | 2                                 |
| 14                                 | 295                              | 36                                | 14                                 | 295                              | 8                                 | 14                                 | 296.3                            | 76                                | 14                                                | 292.3                            | 3                                 |
| 15                                 | 314.1                            | 8                                 | 15                                 | 314.1                            | 130                               | 15                                 | 312.3                            | 409                               | 15                                                | 326.6                            | 52                                |
| 16                                 | 356.8                            | 19                                | 16                                 | 356.8                            | 3                                 | 16                                 | 345.8                            | 23                                | 16                                                | 347.9                            | 14                                |
| 17                                 | 361.6                            | 18                                | 17                                 | 361.6                            | 3                                 | 17                                 | 363.2                            | 12                                | 17                                                | 363.1                            | 6                                 |
| 18                                 | 420.1                            | 109                               | 18                                 | 420.1                            | 74                                | 18                                 | 397.8                            | 2                                 | 18                                                | 398.4                            | 0                                 |
| 19                                 | 426.2                            | 213                               | 19                                 | 426.2                            | 45                                | 19                                 | 446.7                            | 24                                | 19                                                | 423.5                            | 5                                 |
| 20                                 | 473.1                            | 51                                | 20                                 | 473.1                            | 59                                | 20                                 | 486.8                            | 2                                 | 20                                                | 444.5                            | 4                                 |
| 21                                 | 492                              | 169                               | 21                                 | 492                              | 78                                | 21                                 | 499.4                            | 72                                | 21                                                | 451.7                            | 61                                |



|    |        |     |                                                                    |    |        |     |    |        |     |    |        |     |
|----|--------|-----|--------------------------------------------------------------------|----|--------|-----|----|--------|-----|----|--------|-----|
| 22 | 504    | 0   | H <sub>3</sub> C <sub>5</sub> --C <sub>2</sub> O <sub>2</sub> axis | 22 | 504    | 26  | 22 | 506.4  | 58  | 22 | 488.4  | 4   |
| 23 | 517.7  | 36  |                                                                    | 23 | 517.7  | 67  | 23 | 517.9  | 19  | 23 | 503.1  | 2   |
| 24 | 550.2  | 28  |                                                                    | 24 | 550.2  | 43  | 24 | 532.7  | 103 | 24 | 521    | 3   |
| 25 | 557.3  | 0   |                                                                    | 25 | 557.3  | 182 | 25 | 562.8  | 235 | 25 | 533.1  | 0   |
| 26 | 620.3  | 234 | O in-plane bending<br>+ C <sub>6</sub> pyramidalization            | 26 | 620.3  | 10  | 26 | 612.8  | 166 | 26 | 556.4  | 0   |
| 27 | 643.1  | 38  |                                                                    | 27 | 643.1  | 0   | 27 | 635.6  | 253 | 27 | 611.3  | 1   |
| 28 | 657.2  | 282 | breathing along the<br>HC <sub>6</sub> --N <sub>3</sub> H axis     | 28 | 657.2  | 0   | 28 | 641.9  | 0   | 28 | 642.9  | 2   |
| 29 | 675.8  | 267 |                                                                    | 29 | 675.8  | 333 | 29 | 691.6  | 6   | 29 | 689.5  | 0   |
| 30 | 727.4  | 76  |                                                                    | 30 | 727.4  | 6   | 30 | 708    | 0   | 30 | 716.5  | 9   |
| 31 | 735.4  | 4   |                                                                    | 31 | 735.4  | 67  | 31 | 710.9  | 9   | 31 | 733    | 1   |
| 32 | 754.7  | 0   |                                                                    | 32 | 754.7  | 0   | 32 | 734    | 16  | 32 | 742    | 0   |
| 33 | 766.5  | 0   |                                                                    | 33 | 766.5  | 5   | 33 | 767.6  | 5   | 33 | 774.6  | 0   |
| 34 | 837.7  | 6   |                                                                    | 34 | 837.7  | 74  | 34 | 834.3  | 185 | 34 | 838.3  | 5   |
| 35 | 856.4  | 2   |                                                                    | 35 | 856.4  | 26  | 35 | 855.7  | 53  | 35 | 853    | 1   |
| 36 | 893.5  | 4   |                                                                    | 36 | 893.5  | 27  | 36 | 887.3  | 2   | 36 | 878.9  | 67  |
| 37 | 905.5  | 8   |                                                                    | 37 | 905.5  | 141 | 37 | 908.8  | 171 | 37 | 906.7  | 0   |
| 38 | 962.3  | 5   |                                                                    | 38 | 962.3  | 10  | 38 | 961    | 253 | 38 | 960    | 32  |
| 39 | 985.2  | 278 | C <sub>4</sub> -S <sub>4</sub> stretching                          | 39 | 985.2  | 147 | 39 | 993.7  | 9   | 39 | 988.3  | 130 |
| 40 | 1003.7 | 348 |                                                                    | 40 | 1003.7 | 171 | 40 | 1010.1 | 0   | 40 | 994.1  | 26  |
| 41 | 1008.7 | 0   |                                                                    | 41 | 1008.7 | 0   | 41 | 1029.8 | 0   | 41 | 1009.8 | 0   |
| 42 | 1030.6 | 9   |                                                                    | 42 | 1030.6 | 12  | 42 | 1033.5 | 10  | 42 | 1030.3 | 0   |
| 43 | 1043.9 | 16  |                                                                    | 43 | 1043.9 | 141 | 43 | 1053.1 | 0   | 43 | 1040.4 | 0   |
| 44 | 1054.1 | 5   |                                                                    | 44 | 1054.1 | 26  | 44 | 1056.6 | 0   | 44 | 1041.6 | 24  |
| 45 | 1057   | 2   |                                                                    | 45 | 1057   | 0   | 45 | 1079.1 | 0   | 45 | 1051.9 | 0   |
| 46 | 1080.8 | 0   |                                                                    | 46 | 1080.8 | 1   | 46 | 1086.2 | 31  | 46 | 1081.6 | 0   |
| 47 | 1101   | 3   |                                                                    | 47 | 1101   | 24  | 47 | 1105.6 | 37  | 47 | 1099.6 | 0   |
| 48 | 1187.3 | 2   |                                                                    | 48 | 1187.3 | 473 | 48 | 1202.6 | 0   | 48 | 1205.3 | 10  |
| 49 | 1211.4 | 0   |                                                                    | 49 | 1211.4 | 1   | 49 | 1210.4 | 71  | 49 | 1211.9 | 0   |
| 50 | 1232.1 | 0   |                                                                    | 50 | 1232.1 | 127 | 50 | 1244.2 | 6   | 50 | 1240.7 | 0   |
| 51 | 1244.4 | 0   |                                                                    | 51 | 1244.4 | 1   | 51 | 1260.3 | 92  | 51 | 1248   | 64  |
| 52 | 1294   | 0   |                                                                    | 52 | 1294   | 4   | 52 | 1295.9 | 43  | 52 | 1273.1 | 0   |
| 53 | 1308   | 66  |                                                                    | 53 | 1308   | 0   | 53 | 1311.4 | 48  | 53 | 1296.6 | 0   |
| 54 | 1314.7 | 3   |                                                                    | 54 | 1314.7 | 7   | 54 | 1317.6 | 18  | 54 | 1317   | 1   |

|                         |        |      |                         |        |             |                         |        |      |                         |        |      |
|-------------------------|--------|------|-------------------------|--------|-------------|-------------------------|--------|------|-------------------------|--------|------|
| 55                      | 1335.6 | 95   | 55                      | 1335.6 | 659         | 55                      | 1338.9 | 17   | 55                      | 1340.1 | 1    |
| 56                      | 1344.7 | 33   | 56                      | 1344.7 | 111         | 56                      | 1350.2 | 31   | 56                      | 1358.4 | 1    |
| 57                      | 1360.6 | 0    | 57                      | 1360.6 | 0           | 57                      | 1380.6 | 718  | 57                      | 1369.5 | 178  |
| 58                      | 1405.1 | 34   | 58                      | 1405.1 | 26          | 58                      | 1404   | 0    | 58                      | 1391.9 | 0    |
| 59                      | 1406.5 | 27   | 59                      | 1406.5 | 7           | 59                      | 1404.9 | 151  | 59                      | 1401.2 | 13   |
| 60                      | 1411.2 | 269  | 60                      | 1411.2 | 40          | 60                      | 1412.9 | 33   | 60                      | 1405.2 | 1    |
| 61                      | 1429.6 | 45   | 61                      | 1429.6 | 15          | 61                      | 1433.9 | 272  | 61                      | 1413.9 | 6    |
| 62                      | 1434.7 | 58   | 62                      | 1434.7 | 31          | 62                      | 1448.2 | 27   | 62                      | 1442.7 | 11   |
| 63                      | 1461.1 | 232  | 63                      | 1461.1 | 1           | 63                      | 1451.4 | 0    | 63                      | 1452.7 | 6    |
| 64                      | 1473.4 | 18   | 64                      | 1473.4 | 6           | 64                      | 1472.1 | 98   | 64                      | 1484.3 | 2    |
| 65                      | 1485.5 | 18   | 65                      | 1485.5 | 21          | 65                      | 1483.6 | 3    | 65                      | 1485.2 | 0    |
| 66                      | 1492.9 | 53   | 66                      | 1492.9 | 66          | 66                      | 1488.3 | 9    | 66                      | 1492.5 | 27   |
| 67                      | 1502.9 | 3    | 67                      | 1502.9 | 5           | 67                      | 1503.1 | 21   | 67                      | 1504.6 | 0    |
| 68                      | 1514   | 40   | 68                      | 1514   | 221         | 68                      | 1520   | 208  | 68                      | 1531.6 | 0    |
| 69                      | 1533.3 | 0    | 69                      | 1533.3 | 0           | 69                      | 1534.6 | 0    | 69                      | 1539   | 8    |
| 70                      | 1576.3 | 59   | 70                      | 1576.3 | 236         | 70                      | 1573.7 | 570  | 70                      | 1581.4 | 0    |
| 71                      | 1580.7 | 1    | 71                      | 1580.7 | 7           | 71                      | 1583.8 | 5    | 71                      | 1608.9 | 45   |
| 72                      | 1731.1 | 0    | 72                      | 1731.1 | 22          | 72                      | 1741.7 | 12   | 72                      | 1727.4 | 1    |
| 73                      | 1782.8 | 0    | 73                      | 1782.8 | 71          | 73                      | 1766.5 | 175  | 73                      | 1779.4 | 2    |
| $\lambda$ (proj) [cm-1] |        | 3572 | $\lambda$ (proj) [cm-1] |        | <b>4600</b> | $\lambda$ (proj) [cm-1] |        | 6017 | $\lambda$ (proj) [cm-1] |        | 1454 |
| $\Delta E$ [cm-1]       |        | 2742 | $\Delta E$ [cm-1]       |        | 1694        | $\Delta E$ [cm-1]       |        | 6694 | $\Delta E$ [cm-1]       |        | 1613 |

### 4-thioThymine (thymine only)

**Table S7.** Reorganization energies  $\lambda$  [ $\text{cm}^{-1}$ ] along the normal modes of 4TT along the deformations  $\text{FC} \rightarrow \text{Min}_{\text{S}_2}$ ,  $\text{Min}_{\text{S}_2} \rightarrow \text{CI}$ ,  $\text{CI} \rightarrow \text{Min}_{\text{S}_1}$  and  $\text{Min}_{\text{S}_1} \rightarrow \text{Min}_{\text{T}_1}$  using the normal modes of the 4-ThioThymine chromophore. Color code is used to label modes with notable reorganization energies below  $1000 \text{ cm}^{-1}$

| FC $\rightarrow$ Min <sub>S2</sub> |                                  |                                   | Min <sub>S2</sub> $\rightarrow$ CI |                                  |                                   | CI $\rightarrow$ Min <sub>S1</sub> |                                  |                                   | Min <sub>S1</sub> $\rightarrow$ Min <sub>T1</sub> |                                  |                                   |
|------------------------------------|----------------------------------|-----------------------------------|------------------------------------|----------------------------------|-----------------------------------|------------------------------------|----------------------------------|-----------------------------------|---------------------------------------------------|----------------------------------|-----------------------------------|
| Mode                               | $\omega$<br>[ $\text{cm}^{-1}$ ] | $\lambda$<br>[ $\text{cm}^{-1}$ ] | Mode                               | $\omega$<br>[ $\text{cm}^{-1}$ ] | $\lambda$<br>[ $\text{cm}^{-1}$ ] | Mode                               | $\omega$<br>[ $\text{cm}^{-1}$ ] | $\lambda$<br>[ $\text{cm}^{-1}$ ] | Mode                                              | $\omega$<br>[ $\text{cm}^{-1}$ ] | $\lambda$<br>[ $\text{cm}^{-1}$ ] |
| 1                                  | 111.4                            | 18                                | 1                                  | 111.4                            | 401                               | 1                                  | -37.5                            | 0                                 | 1                                                 | 100.1                            | 44                                |
| 2                                  | 157                              | 61                                | 2                                  | 157                              | 0                                 | 2                                  | 129.8                            | 17                                | 2                                                 | 164.9                            | 58                                |
| 3                                  | 208.5                            | 98                                | 3                                  | 208.5                            | 0                                 | 3                                  | 200.1                            | 265                               | 3                                                 | 170.4                            | 338                               |
| 4                                  | 233.1                            | 29                                | 4                                  | 233.1                            | 7                                 | 4                                  | 218.4                            | 1869                              | 4                                                 | 256.6                            | 484                               |
| 5                                  | 258.9                            | 81                                | 5                                  | 258.9                            | 317                               | 5                                  | 281.9                            | 243                               | 5                                                 | 277.4                            | 18                                |
| 6                                  | 304.9                            | 0                                 | 6                                  | 304.9                            | 130                               | 6                                  | 317.2                            | 358                               | 6                                                 | 333                              | 277                               |
| 7                                  | 392.6                            | 65                                | 7                                  | 392.6                            | 73                                | 7                                  | 348                              | 192                               | 7                                                 | 334.7                            | 106                               |
| 8                                  | 470.6                            | 14                                | 8                                  | 470.6                            | 93                                | 8                                  | 490.2                            | 28                                | 8                                                 | 421.8                            | 33                                |
| 9                                  | 493.4                            | 801                               | 9                                  | 493.4                            | 201                               | 9                                  | 505.4                            | 4                                 | 9                                                 | 451.7                            | 41                                |
| 10                                 | 502.2                            | 196                               | 10                                 | 502.2                            | 203                               | 10                                 | 514                              | 244                               | 10                                                | 490.5                            | 9                                 |
| 11                                 | 559.9                            | 41                                | 11                                 | 559.9                            | 177                               | 11                                 | 554.1                            | 51                                | 11                                                | 530.9                            | 8                                 |
| 12                                 | 605.6                            | 69                                | 12                                 | 605.6                            | 15                                | 12                                 | 625.5                            | 492                               | 12                                                | 544.1                            | 1                                 |
| 13                                 | 668.3                            | 1                                 | 13                                 | 668.3                            | 296                               | 13                                 | 639.8                            | 123                               | 13                                                | 621                              | 46                                |
| 14                                 | 699.7                            | 513                               | 14                                 | 699.7                            | 70                                | 14                                 | 706                              | 37                                | 14                                                | 712.7                            | 2                                 |
| 15                                 | 735                              | 1                                 | 15                                 | 735                              | 60                                | 15                                 | 723.3                            | 0                                 | 15                                                | 721.6                            | 4                                 |
| 16                                 | 861.9                            | 4                                 | 16                                 | 861.9                            | 136                               | 16                                 | 858.8                            | 109                               | 16                                                | 854.9                            | 18                                |
| 17                                 | 994.8                            | 685                               | 17                                 | 994.8                            | 474                               | 17                                 | 1031.4                           | 0                                 | 17                                                | 956.1                            | 273                               |
| 18                                 | 1029.5                           | 4                                 | 18                                 | 1029.5                           | 39                                | 18                                 | 1055.4                           | 0                                 | 18                                                | 1039.4                           | 10                                |
| 19                                 | 1056.5                           | 1                                 | 19                                 | 1056.5                           | 0                                 | 19                                 | 1061.9                           | 4                                 | 19                                                | 1040.7                           | 5                                 |
| 20                                 | 1152.8                           | 1                                 | 20                                 | 1152.8                           | 559                               | 20                                 | 1202.6                           | 3                                 | 20                                                | 1203.7                           | 4                                 |
| 21                                 | 1228.3                           | 0                                 | 21                                 | 1228.3                           | 71                                | 21                                 | 1235.1                           | 160                               | 21                                                | 1225.4                           | 8                                 |

|                         |        |      |                         |        |             |                   |        |      |                         |        |      |
|-------------------------|--------|------|-------------------------|--------|-------------|-------------------|--------|------|-------------------------|--------|------|
| 22                      | 1313.5 | 34   | 22                      | 1313.5 | 17          | 22                | 1313.6 | 53   | 22                      | 1265.4 | 24   |
| 23                      | 1346   | 232  | 23                      | 1346   | 876         | 23                | 1377.4 | 400  | 23                      | 1365.7 | 79   |
| 24                      | 1406.4 | 379  | 24                      | 1406.4 | 128         | 24                | 1412.7 | 331  | 24                      | 1390   | 211  |
| 25                      | 1426.8 | 57   | 25                      | 1426.8 | 1           | 25                | 1429.5 | 568  | 25                      | 1404.1 | 0    |
| 26                      | 1442.8 | 0    | 26                      | 1442.8 | 32          | 26                | 1461.2 | 97   | 26                      | 1481.5 | 26   |
| 27                      | 1489   | 0    | 27                      | 1489   | 108         | 27                | 1486.1 | 1    | 27                      | 1485   | 2    |
| 28                      | 1499.4 | 224  | 28                      | 1499.4 | 56          | 28                | 1492.8 | 54   | 28                      | 1495.3 | 7    |
| 29                      | 1516.3 | 138  | 29                      | 1516.3 | 101         | 29                | 1519.8 | 184  | 29                      | 1576.9 | 7    |
| 30                      | 1625.3 | 9    | 30                      | 1625.3 | 263         | 30                | 1637.2 | 390  | 30                      | 1620.8 | 28   |
| 31                      | 1776.9 | 1    | 31                      | 1776.9 | 76          | 31                | 1759.1 | 276  | 31                      | 1773.1 | 1    |
| $\lambda$ (proj) [cm-1] |        | 3757 | $\lambda$ (proj) [cm-1] |        | <b>4980</b> | $\lambda$ [cm-1]  |        | 6553 | $\lambda$ (proj) [cm-1] |        | 2172 |
| $\Delta E$ [cm-1]       |        | 2742 | $\Delta E$ [cm-1]       |        | 1694        | $\Delta E$ [cm-1] |        | 6694 | $\Delta E$ [cm-1]       |        | 1613 |

## 6. Cartesian Coordinates

### 4-ThioThymidine

#### Min<sub>TT</sub>S<sub>0</sub>

|   |           |           |           |
|---|-----------|-----------|-----------|
| S | 23.752890 | 18.541599 | 16.690311 |
| O | 21.924515 | 22.800902 | 18.400704 |
| N | 21.276583 | 20.896015 | 19.570888 |
| N | 22.649513 | 20.740406 | 17.707719 |
| C | 21.341791 | 19.515323 | 19.683423 |
| C | 21.939696 | 21.576835 | 18.559874 |
| C | 22.082331 | 18.725396 | 18.846091 |
| C | 22.803227 | 19.365467 | 17.772326 |
| C | 22.127104 | 17.235775 | 19.018651 |
| H | 20.750659 | 19.066957 | 20.484038 |
| H | 23.136015 | 21.236719 | 16.955675 |
| H | 23.162929 | 16.897032 | 19.177031 |
| H | 21.755018 | 16.740124 | 18.108320 |
| H | 21.510541 | 16.933016 | 19.875209 |
| H | 20.757128 | 21.433165 | 20.257262 |

#### Min<sub>TT</sub>S<sub>2</sub> (<sup>1</sup> $\pi\pi^*$ )

|   |           |           |           |
|---|-----------|-----------|-----------|
| S | 23.710825 | 18.493821 | 16.571236 |
| O | 21.923713 | 22.810992 | 18.388262 |
| N | 21.269787 | 20.911996 | 19.564861 |
| N | 22.658333 | 20.741932 | 17.707866 |
| C | 21.283462 | 19.526131 | 19.703303 |
| C | 21.943607 | 21.586625 | 18.550960 |
| C | 22.083329 | 18.721573 | 18.878881 |
| C | 22.859159 | 19.372992 | 17.926907 |
| C | 22.092601 | 17.226683 | 19.046005 |
| H | 20.685385 | 19.100399 | 20.508385 |
| H | 23.227273 | 21.223226 | 17.004898 |
| H | 23.117077 | 16.845698 | 19.176191 |
| H | 21.668054 | 16.743322 | 18.150877 |
| H | 21.492133 | 16.943031 | 19.919577 |
| H | 20.751715 | 21.464930 | 20.242240 |

#### Min<sub>TT</sub>S<sub>1</sub> (<sup>1</sup> $n\pi^*$ )

|   |           |           |           |
|---|-----------|-----------|-----------|
| S | 24.089311 | 18.714155 | 16.892706 |
| O | 21.899163 | 22.794057 | 18.422163 |
| N | 21.286232 | 20.875015 | 19.581584 |
| N | 22.681120 | 20.768402 | 17.720510 |
| C | 21.297059 | 19.466786 | 19.671134 |
| C | 21.939599 | 21.566420 | 18.580771 |
| C | 22.021493 | 18.691811 | 18.779656 |
| C | 22.696742 | 19.358801 | 17.746796 |
| C | 22.126349 | 17.200229 | 18.954850 |
| H | 20.685672 | 19.018464 | 20.452739 |
| H | 22.945317 | 21.262399 | 16.865695 |
| H | 23.152322 | 16.912412 | 19.243450 |

|   |           |           |           |
|---|-----------|-----------|-----------|
| H | 21.871722 | 16.670880 | 18.022540 |
| H | 21.440425 | 16.859077 | 19.741538 |
| H | 20.771596 | 21.410172 | 20.270634 |

**Min<sub>TT</sub>T<sub>2</sub> (<sup>3</sup>nπ\*)**

|   |           |           |           |
|---|-----------|-----------|-----------|
| S | 24.045594 | 18.614726 | 16.948133 |
| O | 21.872110 | 22.798223 | 18.401501 |
| N | 21.277292 | 20.885912 | 19.576503 |
| N | 22.660382 | 20.774066 | 17.709127 |
| C | 21.306128 | 19.482661 | 19.682081 |
| C | 21.920645 | 21.571054 | 18.561114 |
| C | 22.024018 | 18.701962 | 18.777568 |
| C | 22.686563 | 19.362980 | 17.728549 |
| C | 22.112686 | 17.209913 | 18.962786 |
| H | 20.660103 | 19.030069 | 20.432429 |
| H | 22.969053 | 21.279257 | 16.878090 |
| H | 23.036169 | 16.929923 | 19.496514 |
| H | 22.117321 | 16.700306 | 17.985505 |
| H | 21.255517 | 16.846023 | 19.545422 |
| H | 20.766743 | 21.424089 | 20.265264 |

**Min<sub>TT</sub>T<sub>1</sub> (<sup>3</sup>ππ\*)**

|   |           |           |           |
|---|-----------|-----------|-----------|
| S | 23.847856 | 18.561173 | 16.714621 |
| O | 21.939361 | 22.807843 | 18.432793 |
| N | 21.288471 | 20.900428 | 19.585914 |
| N | 22.695705 | 20.771408 | 17.731673 |
| C | 21.309480 | 19.507621 | 19.711844 |
| C | 21.971428 | 21.579803 | 18.578140 |
| C | 22.133655 | 18.716500 | 18.839168 |
| C | 22.849134 | 19.369474 | 17.836178 |
| C | 22.142240 | 17.231911 | 19.053104 |
| H | 20.652469 | 19.049622 | 20.446836 |
| H | 23.195390 | 21.276615 | 17.000914 |
| H | 22.939571 | 16.746053 | 18.479806 |
| H | 21.168250 | 16.816401 | 18.743711 |
| H | 22.277775 | 17.015346 | 20.122900 |
| H | 20.766214 | 21.445878 | 20.263525 |

**CI<sub>TT</sub>S<sub>2</sub>/S<sub>1</sub>**

|   |           |           |           |
|---|-----------|-----------|-----------|
| S | 23.540166 | 18.468942 | 16.437704 |
| O | 21.972477 | 22.797640 | 18.463191 |
| N | 21.302808 | 20.862378 | 19.570262 |
| N | 22.482803 | 20.731867 | 17.557592 |
| C | 21.236563 | 19.525989 | 19.685206 |
| C | 21.959386 | 21.562337 | 18.487718 |
| C | 22.055690 | 18.691929 | 18.748666 |
| C | 22.583006 | 19.299389 | 17.642687 |
| C | 22.209108 | 17.265253 | 19.146108 |
| H | 20.481775 | 19.094566 | 20.349986 |

|   |           |           |           |
|---|-----------|-----------|-----------|
| H | 22.935522 | 21.174274 | 16.752828 |
| H | 22.592594 | 17.220923 | 20.180027 |
| H | 22.905974 | 16.765023 | 18.465159 |
| H | 21.226557 | 16.760675 | 19.131795 |
| H | 20.819156 | 21.425586 | 20.269306 |

#### 4-ThioUracil

##### Min<sub>TU</sub>S<sub>0</sub>

|   |           |           |           |
|---|-----------|-----------|-----------|
| C | 17.803042 | 18.030324 | 16.491376 |
| N | 18.661627 | 17.002731 | 16.231633 |
| C | 18.410827 | 16.057710 | 15.278065 |
| C | 17.318758 | 16.138658 | 14.477283 |
| C | 16.426965 | 17.250824 | 14.598700 |
| N | 16.752104 | 18.128950 | 15.609377 |
| H | 17.124179 | 15.377005 | 13.740260 |
| S | 15.077605 | 17.502492 | 13.673507 |
| O | 17.941570 | 18.789844 | 17.447464 |
| H | 19.124280 | 15.250151 | 15.226637 |
| H | 16.118840 | 18.911060 | 15.770608 |
| H | 19.485141 | 16.940630 | 16.830954 |

##### Min<sub>TU</sub>S<sub>2</sub>(<sup>1</sup> $\pi\pi^*$ )

|   |           |           |           |
|---|-----------|-----------|-----------|
| C | 17.841461 | 18.030227 | 16.523073 |
| N | 18.697262 | 16.992647 | 16.246535 |
| C | 18.486346 | 15.999033 | 15.300379 |
| C | 17.327340 | 16.110150 | 14.482429 |
| C | 16.493812 | 17.190969 | 14.664435 |
| N | 16.797775 | 18.168909 | 15.620994 |
| H | 17.097003 | 15.354621 | 13.731320 |
| S | 14.984360 | 17.605527 | 13.741444 |
| O | 17.983607 | 18.769867 | 17.513441 |
| H | 19.197703 | 15.176184 | 15.300475 |
| H | 16.105595 | 18.905578 | 15.812271 |
| H | 19.516149 | 16.941708 | 16.879378 |

##### CI<sub>TU</sub>S<sub>2</sub>/S<sub>1</sub> (planar)

|   |           |           |           |
|---|-----------|-----------|-----------|
| C | 17.823628 | 18.004384 | 16.604253 |
| N | 18.641189 | 16.877650 | 16.268697 |
| C | 18.442081 | 15.910003 | 15.389424 |
| C | 17.190553 | 16.149969 | 14.484956 |
| C | 16.409320 | 17.257645 | 14.701938 |
| N | 16.797610 | 18.174037 | 15.757071 |
| H | 16.971291 | 15.439154 | 13.684874 |
| S | 15.005230 | 17.806608 | 13.866585 |
| O | 18.147040 | 18.679691 | 17.609426 |
| H | 19.174197 | 15.099225 | 15.335198 |
| H | 16.113357 | 18.941564 | 15.833937 |
| H | 19.476749 | 16.876242 | 16.902826 |

**CI<sub>TU</sub>S<sub>2</sub>/S<sub>1</sub> (twisted)**

|   |           |           |           |
|---|-----------|-----------|-----------|
| C | 17.775866 | 17.958065 | 16.605199 |
| N | 18.590330 | 16.798769 | 16.362939 |
| C | 18.456784 | 15.923791 | 15.374630 |
| C | 17.167055 | 16.125029 | 14.531413 |
| C | 16.461532 | 17.358758 | 14.579890 |
| N | 16.944524 | 18.288548 | 15.607065 |
| H | 16.796598 | 15.307434 | 13.917903 |
| S | 14.989979 | 17.725329 | 13.902948 |
| O | 18.003918 | 18.583541 | 17.658927 |
| H | 19.340878 | 15.354359 | 15.086153 |
| H | 16.256718 | 19.036039 | 15.798897 |
| H | 19.408063 | 16.756509 | 17.013222 |

**Min<sub>TU</sub>S<sub>1</sub>( $1n\pi^*$ )**

|   |           |           |           |
|---|-----------|-----------|-----------|
| C | 17.783876 | 18.018210 | 16.487077 |
| N | 18.680944 | 17.024615 | 16.215161 |
| C | 18.502802 | 16.063421 | 15.210466 |
| C | 17.398420 | 16.167166 | 14.371364 |
| C | 16.521098 | 17.250044 | 14.525337 |
| N | 16.738543 | 18.146136 | 15.593152 |
| H | 17.208777 | 15.401308 | 13.619063 |
| S | 14.952972 | 17.351192 | 13.742883 |
| O | 17.886569 | 18.763153 | 17.479225 |
| H | 19.207094 | 15.237241 | 15.206599 |
| H | 16.110933 | 18.935102 | 15.774565 |
| H | 19.483656 | 16.972405 | 16.857698 |

**Min<sub>TU</sub>T<sub>1</sub>( $3\pi\pi^*$ )**

|   |           |           |           |
|---|-----------|-----------|-----------|
| C | 17.807640 | 18.044956 | 16.472812 |
| N | 18.699231 | 17.032994 | 16.224927 |
| C | 18.491513 | 16.023161 | 15.278067 |
| C | 17.296346 | 16.059246 | 14.532425 |
| C | 16.425906 | 17.143459 | 14.669849 |
| N | 16.795806 | 18.195080 | 15.541649 |
| H | 17.043039 | 15.237464 | 13.861482 |
| S | 15.101769 | 17.384834 | 13.584329 |
| O | 17.913509 | 18.793336 | 17.461401 |
| H | 19.177048 | 15.180298 | 15.303264 |
| H | 16.109007 | 18.919046 | 15.780443 |
| H | 19.504517 | 16.995436 | 16.869577 |



## 7. DOAS and Target Analyses

The superposition model for the Time Resolved Spectra  $TRS(t, \lambda)$  is given by the matrix formula [2]:  $TRS = C^S(\theta, \mu, \Delta) \cdot SADS^T + \text{Cos}(\omega, \gamma, \mu, \Delta) \cdot A^T + \text{Sin}(\omega, \gamma, \mu, \Delta) \cdot B^T + IRF(\mu, \Delta') \cdot IRFAS^T$

where the populations  $C^S$  are determined by an unknown compartmental model (e.g. Figure S 2), which depends upon the unknown kinetic parameters  $\theta$ . A Gaussian shaped IRF is used, with parameters  $\mu$  for the time of the IRF maximum and  $\Delta$  for the full width at half maximum (FWHM) of the IRF. The matrices  $\text{Cos}(\omega, \gamma, \mu, \Delta)$  and  $\text{Sin}(\omega, \gamma, \mu, \Delta)$  contain the damped oscillations, and the matrices A and B comprise their amplitudes. In order to limit the number of free parameters, we assume wavelength independence of the eigenfrequency  $\omega_n$  and of the damping rate  $\gamma_n$ .

The final term, which describes the coherent artefact, contains a matrix  $IRF(\mu, \Delta')$  with the zeroth, first and second derivative of the IRF [3]. Experimentally we found that the width  $\Delta' > \Delta$ . Associated with each IRF derivative are the columns of the  $IRFAS$  matrix. The ‘‘coherent artefact’’ (CA) is described by the  $IRF(\mu, \Delta') \cdot IRFAS^T$  term. It is clearly visible in the traces at 510 and 601 nm in Figure S 3H,I and Figure S 4H,I, with large contributions of the IRF derivatives (Figure S 3D and Figure S 4D).

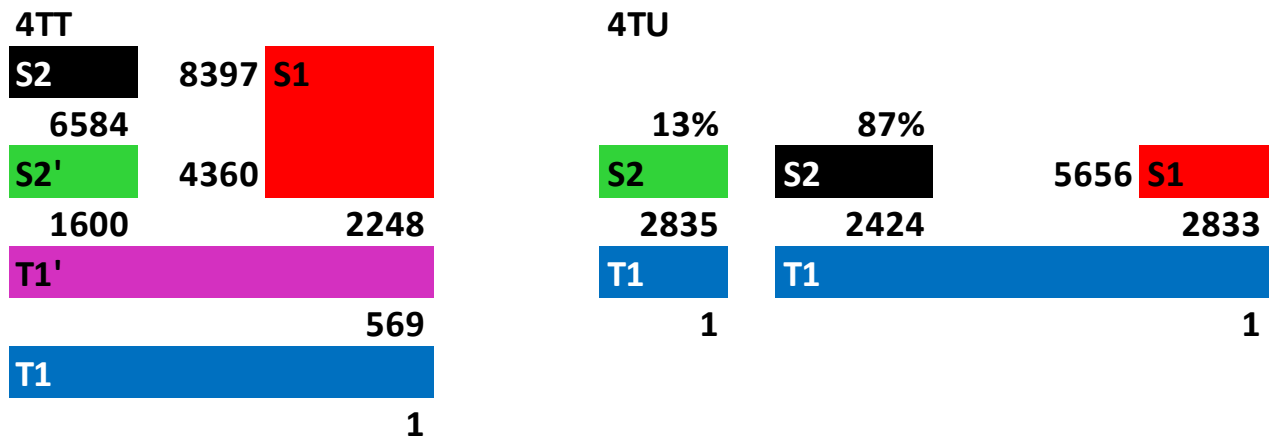

Figure S 2. Kinetic schemes used for the target analysis of 4TT (left) and 4TU (right) in PBS. All rate constants in  $\text{ns}^{-1}$ . Key 4TT: lifetimes: 67 fs ( $S_2(1\pi\pi^*)$ , black), 168 fs ( $S_2'(1\pi\pi^*)$ , green), 445 fs ( $S_1(1n\pi^*)$ , red), 1.76 ps ( $T_1'(3\pi\pi^*)$ , magenta) and long lived ( $T_1(3\pi\pi^*)$ , blue). Key 4TU: lifetimes: major fraction (87%) 124 fs ( $S_2(1\pi\pi^*)$ , black), 353 fs ( $S_1(1n\pi^*)$ , red), and long lived ( $T_1(3\pi\pi^*)$ , blue). Minor fraction (13%) 353 fs ( $S_2'(1\pi\pi^*)$ , green), and long lived ( $T_1(3\pi\pi^*)$ , blue). Note that with the major fraction of 4TU a branching from  $S_2$  has been assumed, with 30% of  $S_2$  directly converting to triplet.

The quality of the fits is demonstrated in the eight representative panels in Figure S 3F-I and Figure S 4F-I. With 4TT, the root mean square error of the fits was 0.123 mOD, which can be judged when comparing the red and black curves in Figure S 3F-I. With 4TU, the root mean square error of the fits was 0.157 mOD, which can be judged when comparing the red and black curves in Figure S 4F-I.

In both 4TT and 4TU the Decay Associated Difference Spectra (DADS) depicted in Figure S 3C and Figure S 4C are complex, indicating that a complex kinetic scheme is necessary. The initial SADS is interpreted as S2 (black in Figure S 3B and Figure S 4B). The final SADS is equal to the final, long-lived DADS that is interpreted as T1 (blue in Figure S 3B,C and Figure S 4B,C). Several kinetic schemes have been tested, until we arrived at the schemes of Figure S 2 with well interpretable SADS that are in accordance with the theory.

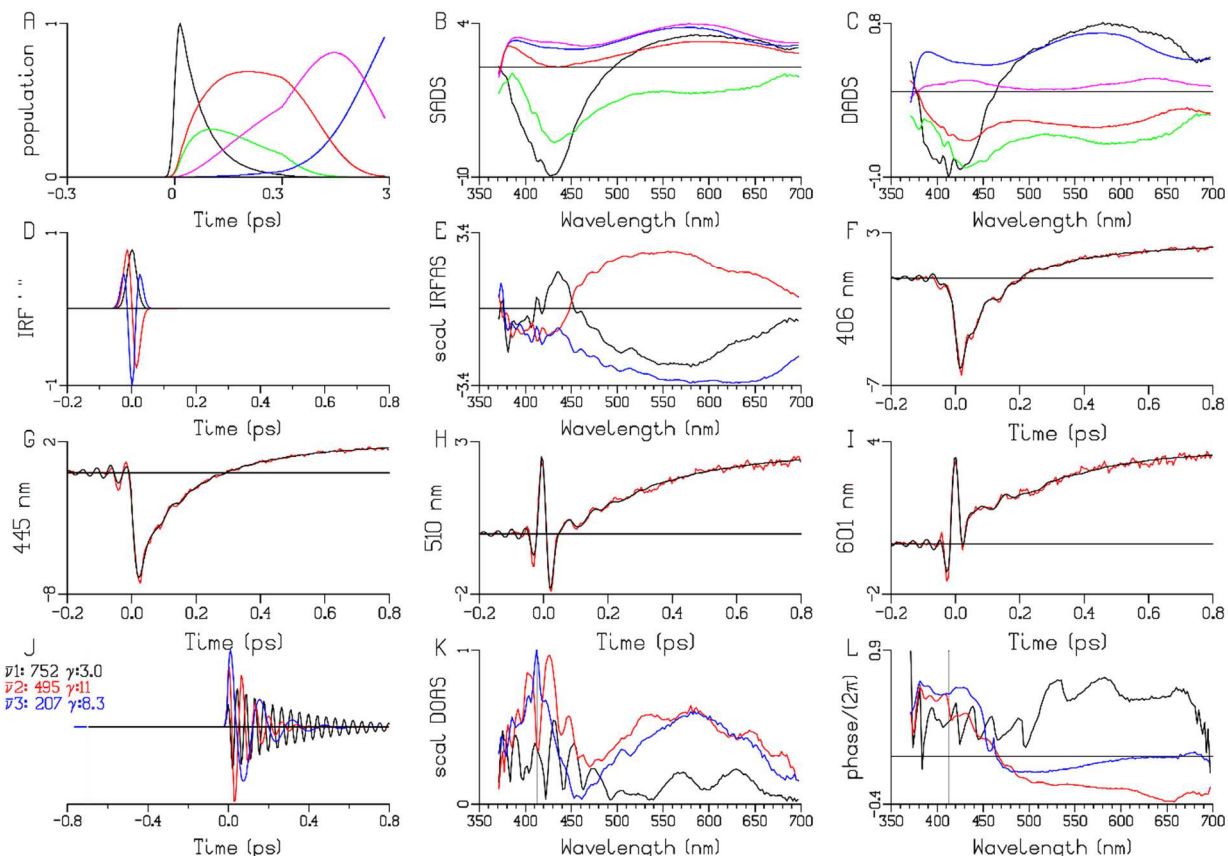

**Figure S 3.** DOAS analysis of 4TT in PBS solution excited with a 20 fs pulse centered at 330 nm. (A) Populations of the kinetic scheme used (Figure S 2A). Estimated SADS (B, in mOD) and DADS (C, normalized). Key A-C, lifetimes: 67 fs ( $S_2(^1\pi\pi^*)$ , black), 168 fs ( $S_2'(^1\pi\pi^*)$ , green), 445 fs ( $S_1(^1n\pi^*)$ , red), 1.76 ps ( $T_1(^3\pi\pi^*)$ , magenta) and long lived ( $T_1(^3\pi\pi^*)$ , blue). (D) CA IRF  $0^{th}$ ,  $1^{st}$  and  $2^{nd}$  derivative (black, red and blue) (E) IRFAS. Scaling of the IRFAS is such that the product of the IRFAS and the IRF derivative is the contribution to the fit. (F-I) Zoom from -0.2 ps to 0.8 ps (after the maximum of the IRF) of the 406, 445, 510, 601 nm data (in mOD, red) and the fit (black). (J-L) Overview of the estimated DOAS and phases. (J) Cosine oscillations with frequencies  $\bar{\nu}n$  (in /cm) (where n is the DOAS number) and damping rates  $\gamma$  (in 1/ps) written in the legend at the left, using the appropriate color. Scaling of the DOAS is such that the product of the DOAS and the damped oscillation is the contribution to the fit. (K) Estimated DOAS (with number indicated in the legend at the far left). (L) Estimated phase profiles of the DOAS. The grey vertical lines at 413 nm in panels K and L are discussed in the main text.

In 4TT, the SE emission from  $S_2$  (large negative amplitudes near 420 nm) disappears in two phases of 67 and 168 fs (black and green DADS in Figure S 3C). This is modelled by the  $S_2 \rightarrow S_2' \rightarrow T_1 \rightarrow T_1$  pathway, where the final step  $T_1 \rightarrow T_1$  represents vibrational relaxation of the triplet state. During this vibrational relaxation ESA disappears around 440 and 640 nm, cf. the magenta DADS in Figure S 3C. This vibrational relaxation is also visible in the 4TT transient absorption data of Fig.1b in [4]. Additionally, 56% of  $S_2$ , and even 73% of  $S_2'$ , decays via the  $S_1$  state. The thus estimated red SADS (Figure S 3B) shows positive ESA around 600 nm and 380 nm that support the interpretation of the red SADS as belonging to the  $S_1$  state.

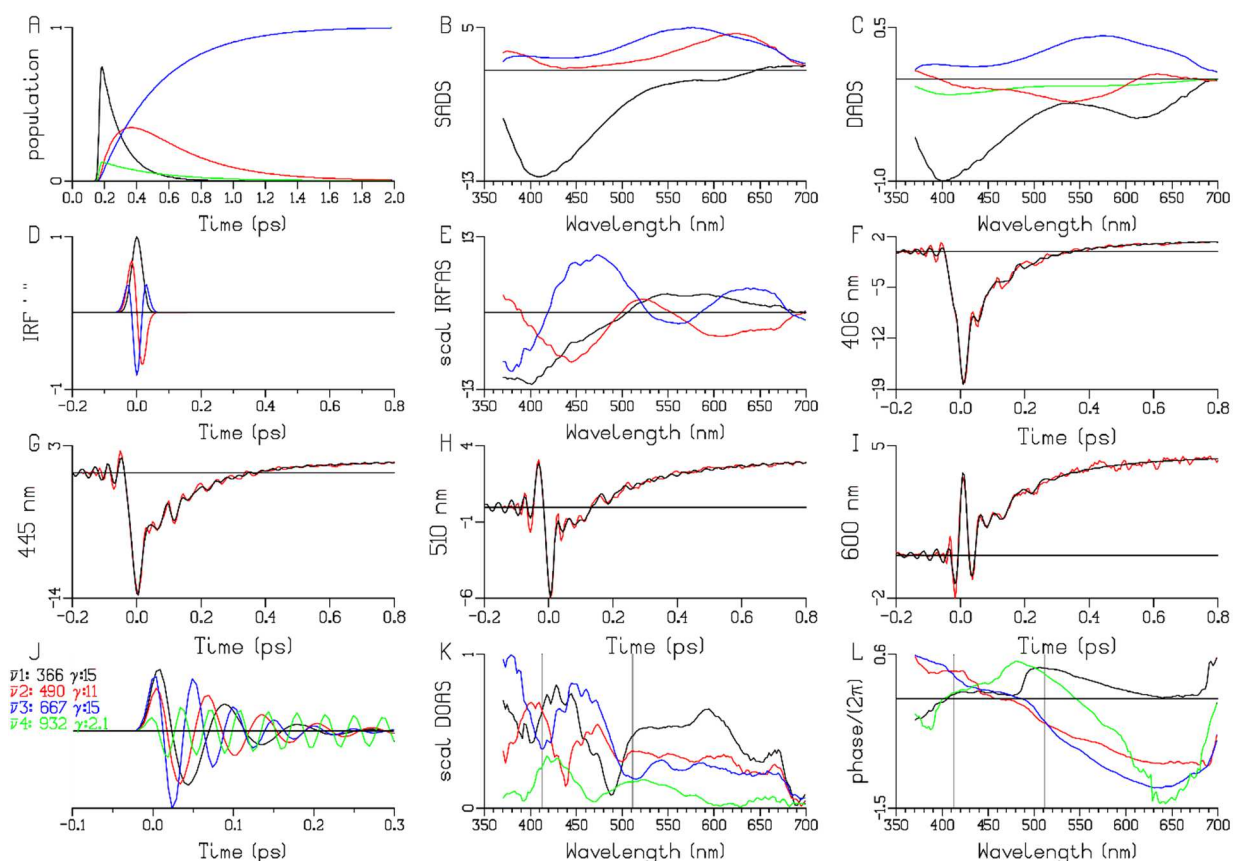

**Figure S 4.** DOAS analysis of 4TU in PBS solution excited with a 20 fs pulse centered at 330 nm. (A) Populations of the kinetic scheme used (Figure S 2B). Estimated SADS (B) and DADS (C). Key A-C, lifetimes: major fraction (87%) 124 fs ( $S_2(^1\pi\pi^*)$ , black), 353 fs ( $S_1(^1n\pi^*)$ , red), and long lived ( $T_1(^3\pi\pi^*)$ , blue). Minor fraction (13%) 353 fs ( $S_2(^1\pi\pi^*)$ , green), and long lived ( $T_1(^3\pi\pi^*)$ , blue). The SADS of black and green are equal. (D) CA IRF  $0^{\text{th}}$ ,  $1^{\text{st}}$  and  $2^{\text{nd}}$  derivative (black, red and blue) (E) IRFAS. Scaling of the IRFAS is such that the product of the IRFAS and the IRF derivative is the contribution to the fit. (F-I) Zoom from -0.2 ps to 0.8 ps (after the maximum of the IRF) of the 406, 445, 510, 601 nm data (in MOD, red) and the fit (black). (J-L) Overview of the estimated DOAS and phases. (J) Cosine oscillations with frequencies  $\bar{\nu}n$  (in /cm) (where  $n$  is the DOAS number) and damping rates  $\gamma$  (in 1/ps) written in the legend at the left, using the appropriate color. Scaling of the DOAS is such that the product of the DOAS and the damped oscillation is the contribution to the fit. (K) Estimated DOAS (with number indicated in the legend at the far left). (L) Estimated phase profiles of the DOAS. The grey vertical lines at 413 and 511 nm in panels K and L are discussed in the main text.

In 4TU the 353 fs decay process is decomposed in two components, green and red. The shape of the green DADS is identical to the shape of the black DADS (Figure S 4C), but the amplitude is much smaller. The green is assumed to represent a small fraction (13%) of more slowly decaying  $S_2$ , whereas the black DADS (124 fs) represents the major fraction (87%) of  $S_2$  that decays to  $S_1$ . In turn  $S_1$  decays to  $T_1$  also in 353 fs. The red 353 fs SADS (Figure S 4B) shows positive ESA amplitude around 630 nm and 380 nm. These features evidence the interpretation of the red SADS as belonging to the  $S_1$  state.

## 8. Target 4TU SADS analyses and assignments of the bands

The 4TU calculated decay path explanation is strongly supported by the good matching between the stimulated emission (SE) and photoinduced absorption (PA) estimations along the relaxation route and the experimental SADS signals. Figure S5 shows these correspondences, referring on the computational results depicted in Figure 2.

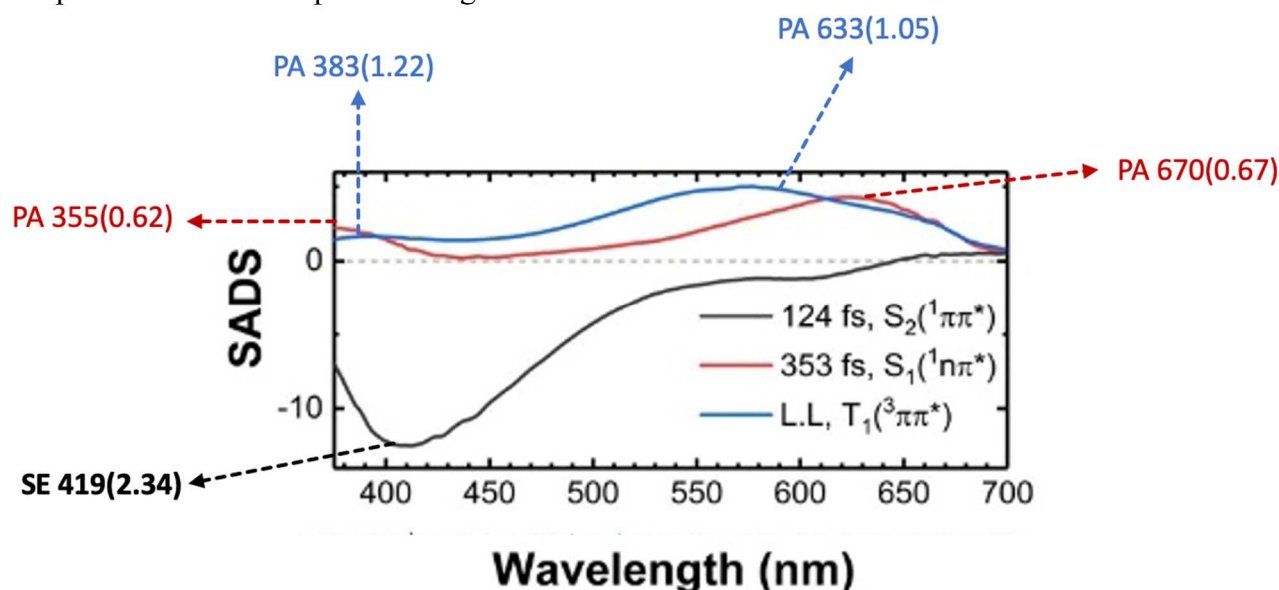

Figure S5. SADS black line, corresponding to the first time constant (124 fs), shows an intense negative band matching exactly with the reported SE value, calculated on top of the  $\text{Min}_{\text{TU}}S_2(^1\pi\pi^*)$  and documented in Figure 2. The red line positive peaks lie in the same region of the PA calculated energy value, on top of the  $\text{Min}_{\text{TU}}S_2(^1n\pi^*)$ . The blue line should represent the final  $T_1$  triplet population ( $^3\pi\pi^*$ ): this is confirmed by the PA calculated signals, which are matching with the experimental bands.

### References:

- [1] R. Borrego-Varillas, D.C. Teles-Ferreira, A. Nenov, I. Conti, L. Ganzer, C. Manzoni, M. Garavelli, A. Maria de Paula, G. Cerullo, Observation of the Sub-100 Femtosecond Population of a Dark State in a Thiobase Mediating Intersystem Crossing, *Journal of the American Chemical Society*, 140 (2018) 16087-16093.
- [2] I.H.M. van Stokkum, M. Klotz, D. Polli, D. Viola, J. Weißenborn, E. Peerbooms, G. Cerullo, J.T.M. Kennis, Vibronic dynamics resolved by global and target analysis of ultrafast transient absorption spectra, *The Journal of Chemical Physics*, 155 (2021) 114113.
- [3] S.A. Kovalenko, A.L. Dobryakov, J. Ruthmann, N.P. Ernsting, Femtosecond spectroscopy of condensed phases with chirped supercontinuum probing, *Physical Review A*, 59 (1999) 2369-2384.
- [4] C. Reichardt, C.E. Crespo-Hernández, Room-Temperature Phosphorescence of the DNA Monomer Analogue 4-Thiothymidine in Aqueous Solutions after UVA Excitation, *The Journal of Physical Chemistry Letters*, 1 (2010) 2239-2243.
